# Supplementary material
Source: MDPI journal article supplement (https://www.mdpi.com/2673-9976/6/1/110)
Supplement: s1 [file s1]

## SUPPLEMENTARY MATERIAL

*Proceeding Paper*

# Natural Deep Eutectic Solvents as Main Solvent for the Extraction of Total Polyphenols of Orange Peel <sup>†</sup>

Clara Gómez-Urios <sup>1</sup>, Adriana Viñas-Ospino <sup>1</sup>, Anna Penadés-Soler <sup>1</sup>, Daniel Lopez-Malo <sup>2</sup>, Ana Frigola <sup>1</sup>, María José Esteve <sup>1,\*</sup> and Jesús Blesa <sup>1</sup>

<sup>1</sup> Nutrition and Food Science Area, Faculty of Pharmacy, University of Valencia, Av. Vicent Andrés Estellés s/n, 46100 Burjassot, Spain; clara.gomez-urios@ext.uv.es (C.G.-U.); aviasos@alumni.uv.es (A.V.-O.); penadesanna@gmail.com (A.P.-S.); ana.frigola@uv.es (A.F.); jesus.blesa@uv.es (J.B.)

<sup>2</sup> Department of Biomedical Sciences, Faculty of Health Sciences, European University of Valencia, Paseo de La Alameda, 7, 46010 Valencia, Spain; dalomalo@gmail.com (D.L.-M.)

\* Correspondence: maria.jose.esteve@uv.es

<sup>†</sup> Presented at the 2nd International Electronic Conference on Foods—Future Foods and Food Technologies for a Sustainable World, 15–30 October 2021; Available online: <https://foods2021.sciforum.net/>.

**Table S1.** ANOVA Proline:Malic Acid.

| Source              | Sum of Squares      | Degrees of Freedom | Mean Square         | F-Value | P-Value  |
|---------------------|---------------------|--------------------|---------------------|---------|----------|
| Model***            | $4.089 \times 10^7$ | 9                  | $4.543 \times 10^6$ | 6.70    | < 0.0001 |
| A- Ratio*           | $2.908 \times 10^6$ | 1                  | $2.908 \times 10^6$ | 4.29    | 0.0423   |
| B- NADES*           | $3.708 \times 10^6$ | 1                  | $3.708 \times 10^6$ | 5.47    | 0.0224   |
| C- Extraction Time* | $5.811 \times 10^6$ | 1                  | $5.811 \times 10^6$ | 8.58    | 0.0047   |
| AB                  | 32121.61            | 1                  | 32121.61            | 0.0474  | 0.8283   |
| AC                  | 93849.96            | 1                  | 93849.96            | 0.1385  | 0.7110   |
| BC                  | $7.428 \times 10^5$ | 1                  | $7.428 \times 10^5$ | 1.10    | 0.2990   |
| A <sup>2</sup> ***  | $1.104 \times 10^7$ | 1                  | $1.104 \times 10^7$ | 16.29   | 0.0001   |
| B <sup>2</sup>      | $5.880 \times 10^5$ | 1                  | $5.880 \times 10^5$ | 0.8677  | 0.3550   |
| C <sup>2</sup>      | $1.042 \times 10^6$ | 1                  | $1.042 \times 10^6$ | 1.54    | 0.2194   |
| Residual            | $4.405 \times 10^7$ | 65                 | $6.776 \times 10^5$ |         |          |
| Lack of Fit***      | $3.006 \times 10^7$ | 12                 | $2.505 \times 10^6$ | 9.49    | < 0.0001 |
| Pure Error          | $1.399 \times 10^7$ | 53                 | $2.639 \times 10^5$ |         |          |
| Cor Total           | $8.494 \times 10^7$ | 74                 |                     |         |          |

\*\*\* $p < 0.001$ ; \*\* $p < 0.01$ ; \* $p < 0.05$

**Table S2.** ANOVA Betaine: Citric Acid.

| Source             | Sum of Squares      | Degrees of Freedom | Mean Square         | F-Value | P-Value  |
|--------------------|---------------------|--------------------|---------------------|---------|----------|
| Model***           | $2.910 \times 10^8$ | 9                  | $3.233 \times 10^7$ | 6.09    | < 0.0001 |
| A- Ratio           | $1.080 \times 10^7$ | 1                  | $1.080 \times 10^7$ | 2.04    | 0.1595   |
| B- NADES           | 96222.55            | 1                  | 96222.55            | 0.0181  | 0.8934   |
| C- Extraction Time | 95995.26            | 1                  | 95995.26            | 0.0181  | 0.8935   |
| AB                 | 17291.98            | 1                  | 17291.98            | 0.0033  | 0.9547   |
| AC***              | $1.870 \times 10^8$ | 1                  | $1.870 \times 10^8$ | 35.25   | < 0.0001 |
| BC                 | $2.090 \times 10^7$ | 1                  | $2.090 \times 10^7$ | 3.94    | 0.0523   |
| A <sup>2</sup> **  | $5.015 \times 10^7$ | 1                  | $5.015 \times 10^7$ | 9.45    | 0.0033   |
| B <sup>2</sup> *   | $2.291 \times 10^7$ | 1                  | $2.291 \times 10^7$ | 4.32    | 0.0425   |
| C <sup>2</sup>     | $1.678 \times 10^7$ | 1                  | $1.678 \times 10^7$ | 3.16    | 0.0811   |
| Residual           | $2.811 \times 10^8$ | 53                 | $5.305 \times 10^6$ |         |          |
| Lack of Fit**      | $1.090 \times 10^8$ | 8                  | $1.363 \times 10^7$ | 3.56    | 0.0028   |
| Pure Error         | $1.721 \times 10^8$ | 45                 | $3.825 \times 10^6$ |         |          |
| Cor Total          | $5.721 \times 10^8$ | 62                 |                     |         |          |

\*\*\* $p < 0.001$ ; \*\* $p < 0.01$ ; \* $p < 0.05$

**Table S3.** ANOVA Choline Chloride: Glycerol.

| Source             | Sum of Squares      | Degrees of Freedom | Mean Square         | F-Value | P-Value  |
|--------------------|---------------------|--------------------|---------------------|---------|----------|
| Model***           | $1.018 \times 10^7$ | 9                  | $1.132 \times 10^6$ | 13.09   | < 0.0001 |
| A- Ratio***        | $3.263 \times 10^6$ | 1                  | $3.263 \times 10^6$ | 37.73   | < 0.0001 |
| B- NADES***        | $2.350 \times 10^6$ | 1                  | $2.350 \times 10^6$ | 27.17   | < 0.0001 |
| C- Extraction Time | $1.946 \times 10^5$ | 1                  | $1.946 \times 10^5$ | 2.25    | 0.1378   |
| AB**               | $6.686 \times 10^5$ | 1                  | $6.686 \times 10^5$ | 7.73    | 0.0069   |
| AC                 | $1.410 \times 10^5$ | 1                  | $1.410 \times 10^5$ | 1.63    | 0.2056   |
| BC                 | $1.306 \times 10^5$ | 1                  | $1.306 \times 10^5$ | 1.51    | 0.2229   |
| A <sup>2</sup> **  | 23941.56            | 1                  | 23941.56            | 0.2769  | 0.6003   |
| B <sup>2</sup> *   | 39911.38            | 1                  | 39911.38            | 0.4615  | 0.4990   |
| C <sup>2</sup>     | 606.47              | 1                  | 606.47              | 0.0070  | 0.9335   |
| Residual           | $6.399 \times 10^6$ | 74                 | 86476.66            |         |          |
| Lack of Fit        | $7.740 \times 10^5$ | 13                 | 59536.69            | 0.6456  | 0.8059   |
| Pure Error         | $5.625 \times 10^6$ | 61                 | 92217.97            |         |          |
| Cor Total          | $1.658 \times 10^7$ | 83                 |                     |         |          |

\*\*\* $p < 0.001$ ; \*\* $p < 0.01$ ; \* $p < 0.05$

**Table S4.** ANOVA Choline Chloride; Fructose.

| Source                | Sum of Squares      | Degrees of Freedom | Mean Square         | F-Value | P-Value  |
|-----------------------|---------------------|--------------------|---------------------|---------|----------|
| Model***              | $1.702 \times 10^8$ | 9                  | $1.892 \times 10^7$ | 18.94   | < 0.0001 |
| A- Ratio              | $5.453 \times 10^7$ | 1                  | $5.453 \times 10^7$ | 54.60   | < 0.0001 |
| B- NADES              | 91612.76            | 1                  | 91612.76            | 0.0917  | 0.7629   |
| C- Extraction Time*** | $4.680 \times 10^7$ | 1                  | $4.680 \times 10^7$ | 46.87   | < 0.0001 |
| AB                    | $2.256 \times 10^6$ | 1                  | $2.256 \times 10^6$ | 2.26    | 0.1372   |
| AC*                   | $4.086 \times 10^6$ | 1                  | $4.086 \times 10^6$ | 4.09    | 0.0468   |
| BC*                   | $4.963 \times 10^6$ | 1                  | $4.963 \times 10^6$ | 4.97    | 0.0289   |
| A <sup>2</sup>        | $3.759 \times 10^5$ | 1                  | $3.759 \times 10^5$ | 0.3764  | 0.5415   |
| B <sup>2</sup>        | $1.295 \times 10^6$ | 1                  | $1.295 \times 10^6$ | 1.30    | 0.2585   |
| C <sup>2</sup> ***    | $2.749 \times 10^7$ | 1                  | $2.749 \times 10^7$ | 27.53   | < 0.0001 |
| Residual              | $7.190 \times 10^7$ | 72                 | $9.987 \times 10^5$ |         |          |
| Lack of Fit***        | $6.951 \times 10^7$ | 13                 | $5.347 \times 10^6$ | 131.83  | < 0.0001 |
| Pure Error            | $2.393 \times 10^6$ | 59                 | 40560.86            |         |          |
| Cor Total             | $2.421 \times 10^8$ | 81                 |                     |         |          |

\*\*\* $p < 0.001$ ; \*\* $p < 0.01$ ; \* $p < 0.05$
